# Supplementary material
Source: Research Square preprint supplement (doi:10.21203/rs.3.rs-9042549/v1)
Supplement: Supplementary file 1 [file f58450f26c8990d06c8863f1.docx]

GEL IMAGE
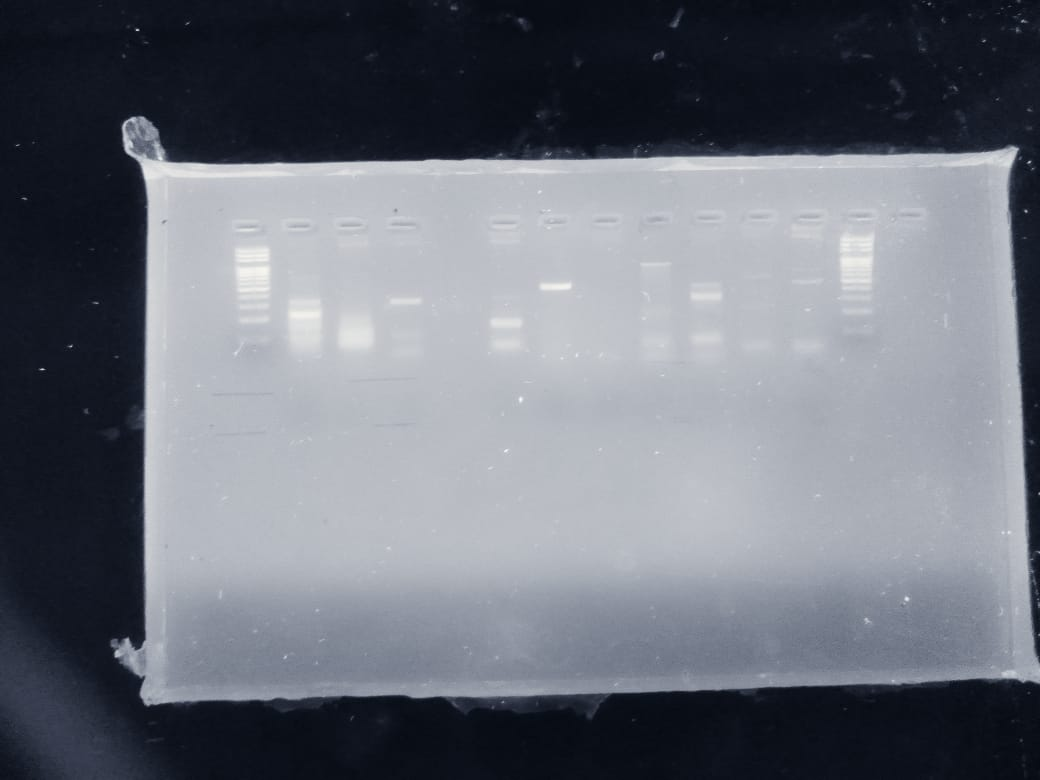


| Isolates | Primers | Number assigned on bands |
| --- | --- | --- |
| M | Ladder | Ladder |
| PC12 | *afaCc* | 1 |
| PC19 | 2 |
| PC12 | *fimH* | 3 |
| PC19 | 4 |
| PC12 | type 1 fimbriae (*FimH*) | 5 |
| PC19 | 6 |
| PC12 | *papC* | 7 |
| PC19 | 8 |
| PC12 | *rmpA* | 9 |
| PC19 | 10 |
| M | Ladder | Ladder |

NOTE:

PC12- *Klebsiella pneumoniae*

PC19- *Chromobacteriun violaceum*

LADDDER

1000 bp

900 bp

800 bp

700 bp

600 bp

500 bp

400 bp

300 bp

200 bp

100 bp
